# Supplementary figures and images for: Generation of a gene-corrected human isogenic iPSC line from an Alzheimer’s disease iPSC line carrying the London mutation in APP (V717I)
Source: PubMed Central journal article supplement — Stem Cell Res. Author manuscript; Available in PMC 2023 Apr 10. (PMC10084742; doi:10.1016/j.scr.2021.102373), 2021-04-30

ADH20190724

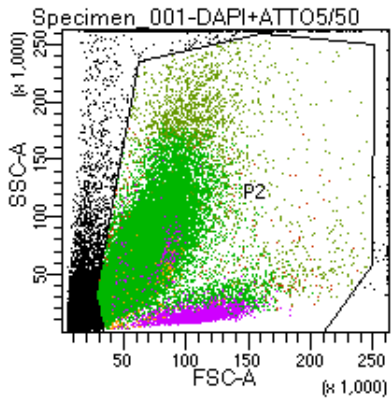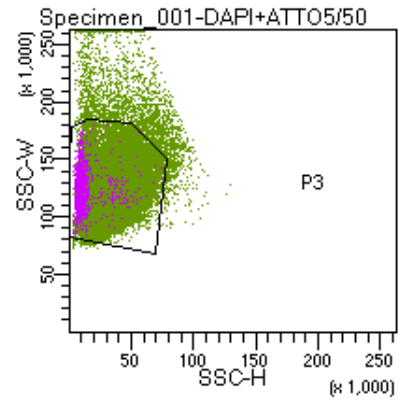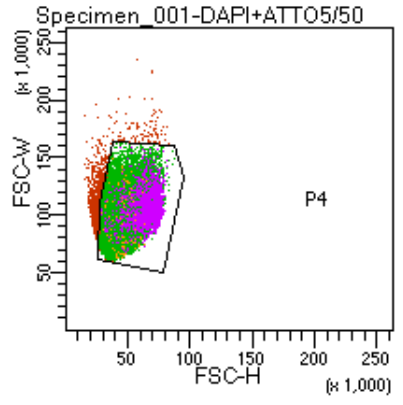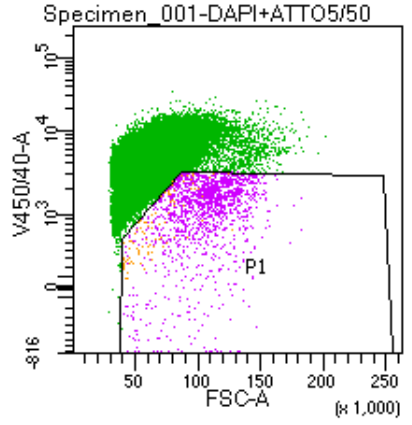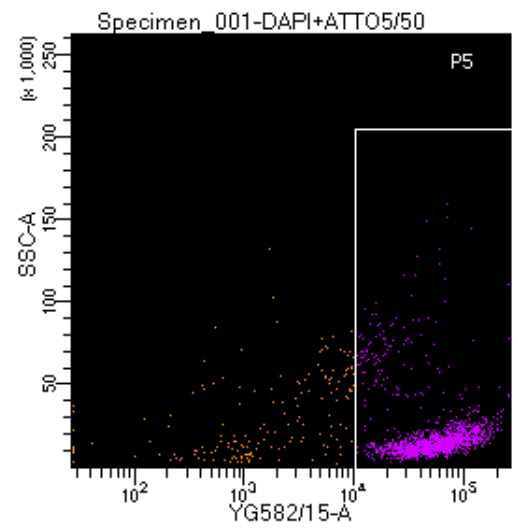

Tube: DAPI+ATTO5/50

| Population | #Events | %Parent | %Total |
|------------|---------|---------|--------|
| All Events | 97,039  | ####    | 100.0  |
| P2         | 51,121  | 52.7    | 52.7   |
| P3         | 48,434  | 94.7    | 49.9   |
| P4         | 46,793  | 96.6    | 48.2   |
| P1         | 1,673   | 3.6     | 1.7    |
| P5         | 1,505   | 90.0    | 1.6    |

Supplement: NIHMS1884993-supplement-Supplemental_Figure_1.pdf [file NIHMS1884993-supplement-Supplemental_Figure_1.pdf]
